# Supplementary material for: Provider Experiences with Chronic Care Management (CCM) Services and Fees: A Qualitative Research Study
Source: Springer Nature journal article supplement (doi:10.1007/s11606-017-4134-7), 2017-07-28
Supplement: MOESM1 [file 13336000]

**OPTIONAL ONLINE APPENDIX CONTAINING INTERVIEW GUIDES**

**Providers’ Experiences with Chronic Care Management (CCM) Services and Fees:**

**A Qualitative Research Study**

**CONTENTS**

Semi-structured Interview Guide for the Eligible Professionals pages 2-8

Semi-structured Interview Guide for Professional Society Representatives pages 9-12

Provider interview protocol

I. Internal notes

This interview is intended for eligible professionals and if needed a second practice respondent (e.g. practice manager or biller or care manager.) The interviewer will get a feel about the provider’s knowledge during the interview and then decide which questions to ask the second respondent; thus, we do not label each question as being intended for the provider vs. the potential 2nd practice respondent. Only questions applicable to non-billing providers will be asked of non-billers.

II. Introduction

Thank you for taking the time to talk with me today. My name is ____ and I work for an independent research organization called, Mathematica Policy Research. We would like to hear from you about your practice’s experiences with the new Chronic Care Management Services and Fee that became part of the physician fee schedule for Medicare starting in January of 2015. As you may recall, this new CCM fee, which is billed as CPT code 99490, reimburses practitioners for time that they and their staff spend managing patients’ care outside of the office visit. This includes at least 20 minutes of clinical staff time for non-face-to-face services per calendar month for Medicare patients with 2 or more chronic conditions.

Your responses are important to help us understand how CCM services are being implemented and experienced by practices. We are talking with a random sample of practitioners from across the United States. There are no right or wrong answers to these questions.

This interview is completely confidential. Nothing you say today will ever be tied to you or to your practice. You and your practice are NOT being audited or evaluated. Rather, CMS has asked us to do an anonymous research study to hear directly from health care providers about their experience with CCM services and the CCM fee. Neither your name nor the name of your practice will be mentioned in any summary report we write for CMS.

May we have your permission to record this interview? [RA will take verbatim notes as well-but you don’t have to mention that.]

Do you have any questions before we begin? [**Interviewer** see our FAQs if needed.]

III. Practice characteristics

**[Interviewer:** ALL interview questions should be asked of all eligible professionals or their practice manager/second respondent if they need one to complete the information**]**

- How many doctors or independent clinicians work at the practice location where you spend the most time seeing patients; we are referring to the number of clinicians with whom you share a front desk?
- Do you own your practice or is it owned by a larger entity?
- IF LARGER ENTITY, then is it a physician-owned organization or part of a hospital/health system?
- Is your practice a recognized patient-centered medical home?
- Why did the practice decide to bill for the CCM fee?

IV. Decision to adopt CCM

[For system-owned practices and large independent practices]

- Was the decision motivated by the clinicians at your practice site, or by someone in the larger system?
- How was it decided which providers should bill for the CCM fee?
- Does your practice’s parent organization provide support for CCM services? What kind of support?

V. Care management model

- ***Care management delivery.*** Please describe how care management is delivered at your practice. For example, is there a nurse care manager or are care management roles distributed among different team members in the practice?
- Probe: Are all the staff that provide care management services physically located at your practice? (Please describe)
- Probe: what are the key tasks that the care manager/key staff/outside contactor performs for CCM services?
- How are the various elements of CCM services divided up among team members at your practice? (Who does what?)
- ***Outside care management services.*** Do you use care management services from outside your organization (e.g. a nurse care manager who is employed by another organization than the one that employs you)?

IF YES, THEN PROBE:

- Could you tell me why your practice chose to use an outside organization?
- What does that outside organization do for your CCM patients?
- Probe: How often do you (the clinician) have personal contact with [outside organization] to discuss’ chronic care management?
- Probe: Do you feel that the work done by [outside organization] is having any impact on the quality of care for your patients?
- Probe: Does [outside organization] send a person to your practice on a regular basis? If so, how often?
- Probe: Does using [outside organization] for CCM services affect your personal relationship with patients? IF SO ASK, How?
- Patient population
- How do you decide which patients you’ll bill the CCM fee for?
- Is there a combination of chronic conditions among patients in your practice for whom you bill the CCM fee? (Probe: have you decided, for example, to focus on patients with diabetes and another chronic condition? Or are you just looking at patients with 2 chronic conditions more generally?)
- [If they are focusing on patients with specific chronic conditions ask], How did you come to that decision? (Probe: participation in a prior initiative focused on that condition(s).)

VI. Beneficiaries’ consent and perceptions

- Consent process
- How does your practice approach Medicare patients for CCM consent?
- Who at the practice approaches the patient for consent?
- How is CCM described to the patient? What terms do you or your staff use to refer to CCM to patients?
- Letter of consent
- How did your practice develop the letter of consent you use?
- Would you be willing to email us a copy of your letter of consent and if you have one, a pamphlet you use to describe CCM services to patients? Feel free to cross out your practice name before emailing it to us (Rumin [rsarwar@mathematica-mpr.com](mailto:rsarwar@mathematica-mpr.com) or Patrick’s [pbalke@mathematica-mpr.com](mailto:pbalke@mathematica-mpr.com) email). (This is just for our learning purposes, we will not tie your name to the letter or pamphlet.)
- Frequency of consent
- How often do patients consent to CCM services when offered?
- Alternative probe: How often are patients offered chronic care management services, but do not consent?
- When asked if they would like to receive the services, why do patients consent or not consent?
- Does having supplemental insurance make a difference in whether a patient agrees to sign up for the CCM service?
- Have any of your patients that initially signed the letter of consent for CCM services revoked the service (or said they didn’t want it anymore)?
  - - - Probe: If so, what reasons have they given? (Probe: out of pocket costs?)
- ***Lessons learned.*** Please describe any lessons learned about how to introduce the concept of CCM services and the CCM fee to patients.
- Probe: Do patients typically understand what CCM services are?
- ***Beneficiary perception.*** What do your patients think about the CCM services?

VII. Scope of service elements

**These next questions seek your experience and opinion about providing chronic care management services for your Medicare beneficiaries:**

- Providing Care Management Services.
- Has the practice’s approach to providing care management services to patients changed with the CCM fee?
  - - - If so, how? (Probe for as many examples as possible)
- Did providing CCM services alter the time and resources needed to provide care management services to patients at your practice, or is this time you were already spending on their care?
- How much time do you (and your team) spend per month on the average CCM patient providing CCM services outside of the office visits?
- Access to Care
- To what extent has it been possible for your practice to have a clinician or staff member providing CCM services available to patients 24/7? Does that person have access to the patients’ medical record 24/7?
  - - - What does this arrangement look like for your practice? (e.g. on-call clinician has access to the patient’s health record?)

Probe: What challenges, if any, do you face in providing 24/7 access?

- If you had to estimate, what percentage of CCM patients have continuity of care with the same provider for routine appointments?
- How useful do you or your team find telephone calls to patients or their caregivers in providing chronic care management services?
  - - - How useful do you or your team find secure email or other non-face-to-face communication methods in providing chronic care management services?

Probe: Do your patients face any barriers to using email and portals for this type of communication?

- **EHR**
- Did the CCM fee impact how the practice documents care in its EHR?

IF YES: Do the changes focus simply on documentation needed for billing or do they affect clinical management?

[IF THEY AFFECT CLINICAL MANAGEMENT ASK] Can you tell me how?

- How useful or challenging have you found your EHR for recording patient information required for CCM services?

Probe for examples of challenges, if any.

- **Comprehensive Care plan**
- Do you create care plans for your patients? [If respondent is unfamiliar with the term say: Care plans typically list the patient’s key health issues, goals for management and steps to achieving those goals.]
- What challenges, if any, do you face in creating care plans?

Probe: Who typically creates the care plan?

Probe: When and how is the care plan used?

- Has the content or structure of the care plan changed in any way since you started billing for the CCM service? (If yes, ask, HOW did it change?)
- Are the people who need to see the care plan able to access it electronically 24/7?
- If you had to estimate, for what percentage of your CCM patients is your practice able to provide patients with a written or electronic copy of the care plan?
- Has your practice shared care plans electronically outside of the practice, for example with other specialists who also care for your patients? To what extent is it possible for your practice to do so? What challenges do you face in sharing the care plan with outside specialists?

**Interviewer Note:** If the practice seems to have a care plan template, ask if they would be willing to send a copy of the template to Rumin/Patrick. Tell them that they can remove their practice name from the top of the care plan template.

- **Staffing**
- Did the decision to provide CCM services change the roles within the primary care team? For example, did it change how each person spends their time or their duties?
- Were any new staff added or were staff repurposed after the decision to provide CCM services?

VIII. Changes involved for billing for CCM services

1. **Billing Process**

- Has your practice set up a process for billing for CCM services? Can you describe that process?
- How do you decide how often to bill the CCM fee for patients?
- Why did your practice decide to bill this way?

1. **Understanding of billing requirements**

- What do you see as the key requirements for billing the CCM fee? (ask of clinician and practice manager)

1. **Barriers to billing/providing CCM services**

- What are the barriers to providing and billing for CCM services? (Let them answer first and then if they cannot provide a good description of barriers use these probes)
- Probes: letter of consent requirement, patient’s out-of-pocket cost, setting up billing process, EHR interoperability requirements, practice level autonomy to alter care processes (for those that are employed by large systems)?
- How have you overcome challenges to billing for CCM services?
- Are there providers you know who have not been billing for the CCM service?
- Probe: What are their reasons for not billing? (Let them answer first and then if they cannot provide a good description of barriers use these probes)

Probes: letter of consent requirement, coinsurance, setting up the process for billing, EHR interoperability requirements? Other reasons?

1. **Practitioners’ perceptions on overall scope and payment**

- How do you feel about the overall scope of services required to bill for CCM payment?
- Did the change in Medicare’s compensation for CCM change the services your practice offers?
- Are any of the services your practice put in place for CCM also being incorporated into the care of non-CCM patients in your practice? If so, which services?
- Does the payment amount for CCM cover the CCM services you are required to offer?
- IF NOT, what amount of reimbursement would cover your costs for providing CCM services? How did you estimate this amount?

IX. Perceived impact of CCM

- **Care continuity and coordination**
- Does the CCM service affect the continuity of your relationship with your patients? If so, how?
- Does the CCM service or fee have any impact on your practice’s ability to coordinate your patients’ care with other specialists?
- Probe: Did coordination improve or get worse?
- If coordination improved, what did your practice do that led to increased care coordination?
- If coordination worsened, what caused that?
- ***Patient outcomes.*** Do you think thatCCM services your practice provides have any impact on patients’:
- Emergency department use?
- Hospitalizations?
- Rates of self-referral to specialists?
- Other areas?
- **Expenditures**

**If they answer “yes” to any above questions on patient outcomes, ask:** what specifically has your practice done that you think contributed to this reduction/increase in _________?

**If they answer “no” to any above questions, say:** please say more about why you think the CCM is not influencing _____.

- ***Unintended consequence*s.** Are you facing any unexpected challenges as a result of the CCM fee?
- Probe: Any impact on the patient-physician (clinician) relationship?
- Probe: Any confusion among patients about who their primary care provider is?
  - - - Probe: Please tell me more about this.
- Is there anything I have not asked you that you think is important for CMS to better understand about the CCM fee and CCM services?

Probe: What could improve uptake of this service and billing fee by clinicians?

Thank you for your time today. Your input will help us understand how the chronic care management program can be made more clinically useful for both clinicians and patients.

Semi-structured Interview Protocol for
Professional Society Representatives

Professional Society Representative Interview Protocol

Introduction

Thank you for taking the time to talk with me today. My name is ____ and I work for an independent research organization called, Mathematica Policy Research. We would like to hear from you about your members’ experiences with the new Chronic Care Management Services and Fee that became part of the physician fee schedule for Medicare starting in January of 2015. As you may recall, this new CCM fee, which is billed as CPT code 99490, reimburses practitioners for time that they and their staff spend managing patients’ care outside of the office visit. This includes at least 20 minutes of clinical staff time for non-face-to-face services per calendar month for Medicare patients with 2 or more chronic conditions.

Your responses are important to help us understand how CCM services are being implemented and experienced by practices. We are talking with professional society representatives from a range of specialties. There are no right or wrong answers to these questions.

This interview is completely confidential. Nothing you say today will ever be tied to you or to your organization. Rather, CMS has asked us to do an anonymous research study to hear directly from health care providers about their experience with CCM services and the CCM fee. After interviewing representatives from leading medical professional organizations, we’ll be interviewing clinicians identified from a random sample of Medicare Claims to hear about their experiences providing CCM services.

May we have your permission to record this interview? [RA will take verbatim notes as well-but you don’t have to mention that.]

Do you have any questions before we begin?

Practice characteristics

- Have you found common characteristics among your members that have decided to bill for the Chronic Care Management fee?

Probe: smaller vs. larger practices

Probe: physician owned vs. hospital system owned

Probe: regional variation

Probe: participation in prior primary care initiatives

Probe: working in a market where commercial payers are paying their own CCM fee

[After each response ask the respondent to “tell me more” about why they think this pattern is present]

- ***Decision to adopt CCM.*** Why do practices decide to bill for the CCM fee?
- What are you hearing from your members about challenges they face in billing for the CCM fee?
- How have they overcome those challenges?
- What are you hearing from your members about what is helpful to them in billing for the CCM fee?

Scope of service elements

- Which CCM service elements do your members find most challenging?
- Probes:
- care plan creation,
- making care plans accessible to staff at point of care,
- providing patients with 24/7 access to a health care practitioner in the practice who has access to the patient’s record,
- EHR requirements,
- follow-up of patients after hospital discharge or ED visits,
- coordinate with other specialists the patient sees,
- coordination with home and community based services,
- obtaining letter of consent,
- helping patients understand the 20% out of pocket payment for the CCM service.
- How do you advise your members about who should sign the letter of consent for CCM services when a beneficiary is not able to do so?
- To what extent are practices trying to risk stratify their patients before deciding which patients to provide CCM services to?

Probe: Are you noticing any difference in this for practices that are part of ACOs vs. not?

- Are you hearing from your members that they themselves (the clinicians) are spending more time performing CCM services, or do they tend to task that work to other members of the primary care team?

Probe: Could you provide any specific examples?

[Probe for as many examples as they have.]

- Are practices that provide CCM services adding new staff or are they instead repurposing existing staff to provide CCM services?
- Do you hear much about practices contracting with third parties to provide some of the CCM services?

**Unintended consequences.** Are you facing any unexpected challenges as a result of the CCM fee?

Probe: Any impact on the patient-physician (clinician) relationship?

Probe: Any confusion among patients about who their primary care provider is?

Probe: Please tell me more about this.

Probe: Could you provide an example of this?

Probe: Any other examples you can provide?

- Do you know physicians (NPs. PAs) who have chosen NOT to bill for the CCM service that we might be able to interview?

Collect: Name, Email, Phone, Location

- Is there anything I have not asked you that you think is important for CMS to better understand about the CCM fee and CCM services?
- What could improve uptake of this service and billing fee by clinicians?

Thank you for your time today. Your input will help us understand how the chronic care management program can be made more clinically useful for both clinicians and patients.
